# Supplementary material
Source: publisher site journal article supplement (http://www.kjim.org/upload/media/kjim-2020-240-suppl4.pdf)
Supplement: Supplementary file 1 [file kjim-2020-240-suppl4.pdf]

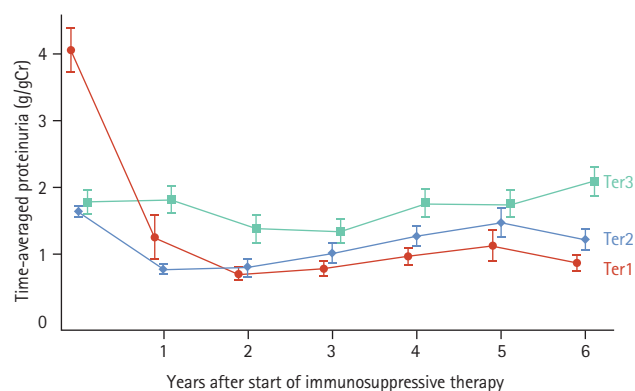

**Supplementary Figure 2.** Changes in time-averaged proteinuria in immunoglobulin A nephropathy patients who underwent immunosuppressive therapy. Patients were categorized into tertiles according to the extent of time-averaged proteinuria reduction after immunosuppression. Markers and capped spikes represents means and standard errors. Ter1, first tertile; Ter2, second tertile; Ter3, third tertile.
